# Supplementary material
Source: Copernicus journal article supplement (doi:10.5194/tc-20-2089-2026)
Supplement: Supplementary file 1 [file tc-20-2089-2026-supplement.pdf]

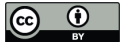

*Supplement of*

**Brief communication: Uncertainties in Southern Ocean sea surface conditions and their impact on Antarctic climate over 1958–1978**

**Quentin Dalaiden and Ingo Bethke**

*Correspondence to:* Quentin Dalaiden ([quentin.dalaiden@nersc.no](mailto:quentin.dalaiden@nersc.no))

The copyright of individual parts of the supplement might differ from the article licence.

## Supplements

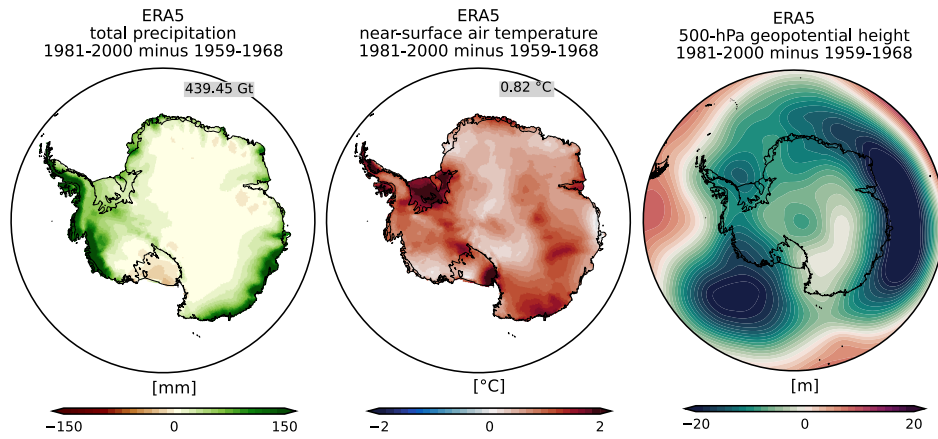

**Figure S1.** Total precipitation (left), near-surface air temperature (center) and 500-hPa geopotential heights (right) changes between 1981–2000 and 1959–1968 in ERA5. For total precipitation and near-surface air temperature, the corresponding continental mean change is also indicated.
